# Supplementary material for: MRGPR-mediated activation of local mast cells clears cutaneous bacterial infection and protects against reinfection
Source: PubMed Central journal article supplement — Sci Adv. 2019 Jan 2;5(1):eaav0216. doi: 10.1126/sciadv.aav0216 (PMC6314830; doi:10.1126/sciadv.aav0216), 2019-01-02
Supplement: aav0216_SM.pdf [file aav0216_SM.pdf]

## Supplementary Materials for

### **MRGPR-mediated activation of local mast cells clears cutaneous bacterial infection and protects against reinfection**

Mohammad Arifuzzaman, Yuvon R. Mobley, Hae Woong Choi, Pradeep Bist, Cristina A. Salinas, Zachary D. Brown, Swaine L. Chen, Herman F. Staats, Soman N. Abraham\*

\*Corresponding author. Email: soman.abraham@duke.edu

Published 2 January 2019, *Sci. Adv.* 5, eaav0216 (2019)  
DOI: 10.1126/sciadv.aav0216

#### **This PDF file includes:**

- Table S1. Antibacterial and MC-activating capacities of mastoparan analog peptides.
- Fig. S1. Depletion of CTMCs.
- Fig. S2. Correlation between CFU and lesion size.
- Fig. S3. Depletion of neutrophils.
- Fig. S4. Receptor specificity of mastoparan.
- Fig. S5. Detection of granulated MCs by toluidine blue staining.
- Fig. S6. Comparison of mastoparan with triple antibiotic.
- Fig. S7. Mastoparan treatment in neutrophil-depleted mice.
- Fig. S8. Flow cytometry plots from skin samples.
- Fig. S9. Flow cytometry plots from lymph node samples.

**Table S1. Antibacterial and MC-activating capacities of mastoparan analog peptides.**

| Peptide <sup>1</sup> | MIC<br>( $\mu\text{g/ml}$ ) <sup>2</sup> | Degranulation<br>>5% by 25 $\mu\text{M}$ |
|----------------------|------------------------------------------|------------------------------------------|
| 13L                  | 32                                       | Yes                                      |
| 6K                   | X                                        | No                                       |
| 6A                   | X                                        | No                                       |
| 6C                   | X                                        | No                                       |
| 6D                   | X                                        | No                                       |
| 6E                   | X                                        | No                                       |
| 6F                   | 124                                      | No                                       |
| 6G                   | X                                        | No                                       |
| 6H                   | X                                        | No                                       |
| 6I                   | 32                                       | No                                       |
| 6M                   | 124                                      | No                                       |
| 6N                   | X                                        | No                                       |
| 6P                   | X                                        | No                                       |
| 6Q                   | X                                        | No                                       |
| 6W                   | X                                        | Yes                                      |

<sup>1</sup>The number indicates position of the single amino acid substitution and the letter represents single-letter code for the substituting amino acid.

<sup>2</sup>The X indicates MIC > 500  $\mu\text{g/ml}$

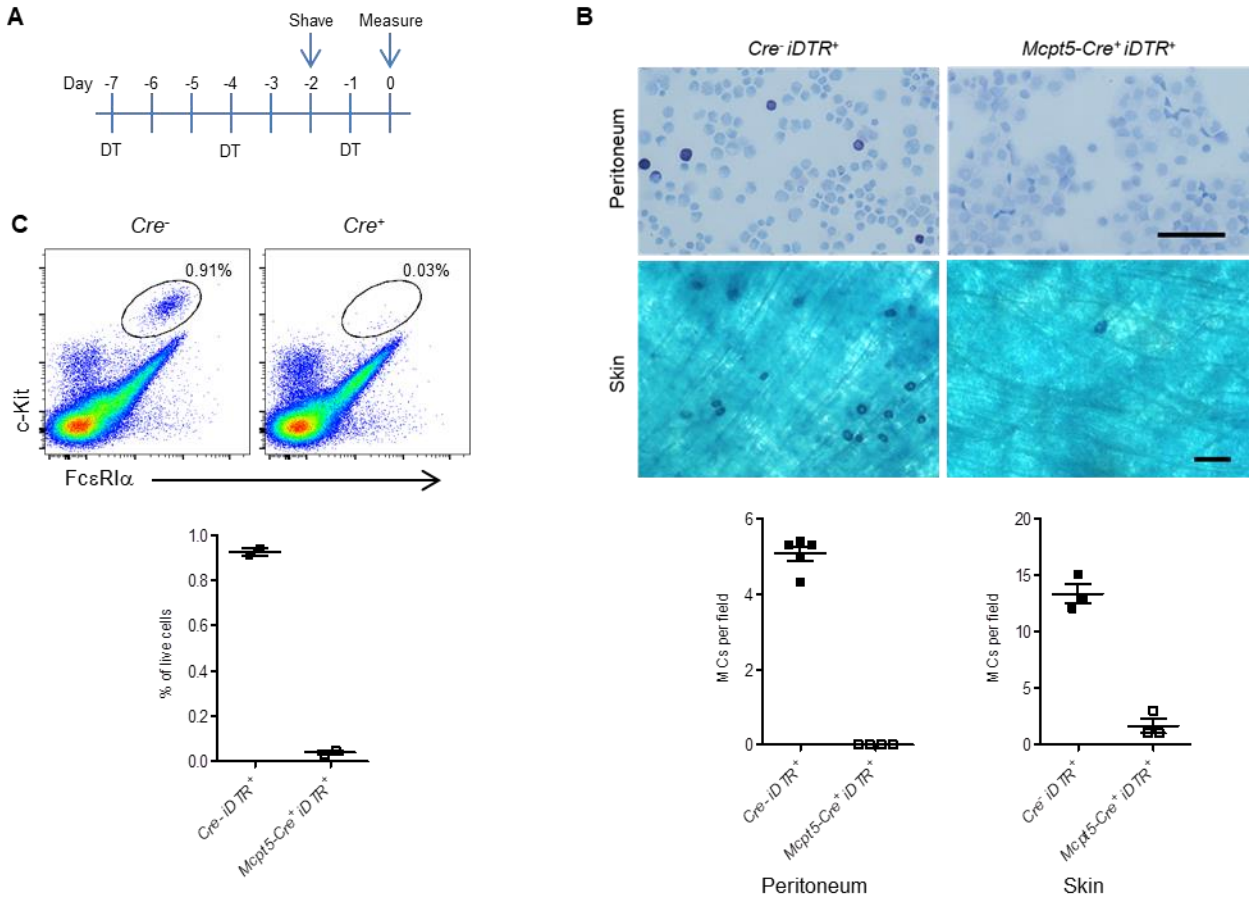

**Fig. S1. Depletion of CTMCs.** (A) Schematic plan for CTMC depletion. Depletion of CTMCs was achieved by treating *Mcpt5-Cre<sup>+</sup> iDTR<sup>+</sup>* mice or littermate controls (*Cre<sup>-</sup> iDTR<sup>+</sup>*) intraperitoneally and subcutaneously with diphtheria toxin (DT) every 3<sup>rd</sup> day for seven days. (B) Representative images of granulated mast cells stained with toluidine blue in peritoneal lavage or dorsal skin whole mount 24 hours after 3<sup>rd</sup> dose of DT. Scale bar 10 μm. Graphs at the bottom show depletion of MCs in *Mcpt5-Cre<sup>+</sup> iDTR<sup>+</sup>* mice compared to control (*Cre<sup>-</sup> iDTR<sup>+</sup>*) mice. (C) Representative flow cytometry plots showing FcεRIα<sup>+</sup> c-Kit<sup>+</sup> MCs in single cell suspensions from infected *Cre<sup>-</sup>* and *Cre<sup>+</sup>* mice. Graph at the bottom shows percentage of MCs (n = 2).

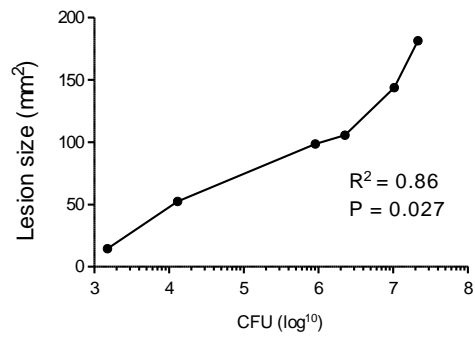

**Fig. S2. Correlation between CFU and lesion size.** In the dermonecrotic *S. aureus* infection model, skin samples were collected at various days post infection. R indicates the Person's correlation coefficient.

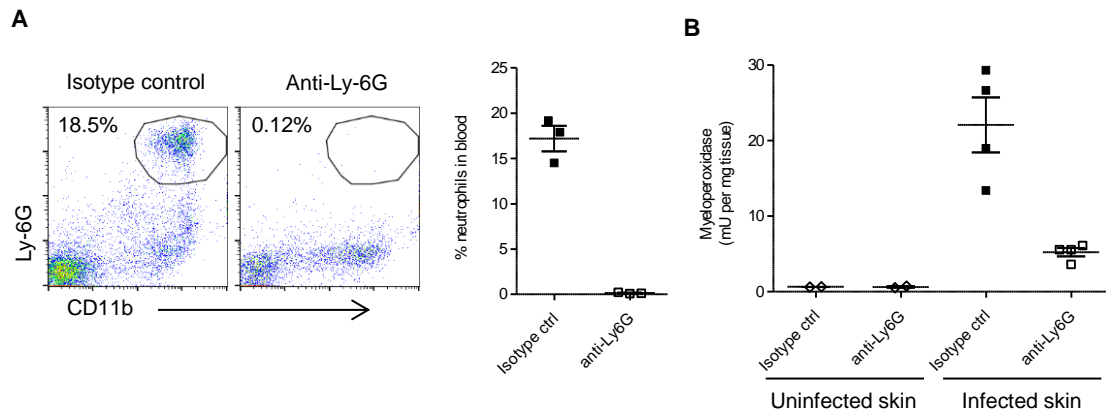

**Fig. S3. Depletion of neutrophils.** (A) Representative flow cytometry plots and graph showing almost complete depletion of CD11b<sup>+</sup>Ly6G<sup>+</sup> neutrophils in blood 48 hours post intraperitoneal injection with 500  $\mu$ g anti-Ly6G antibody. (B) Quantitation of neutrophils in dorsal skin by MPO assay in uninfected and infected (*S. aureus*) mice pre-treated with neutrophil-depleting (Ly6G) or control antibody. Recruitment of neutrophils to infected skin at 4 hours post infection was minimal in anti-Ly6G-treated mice because of successful depletion.

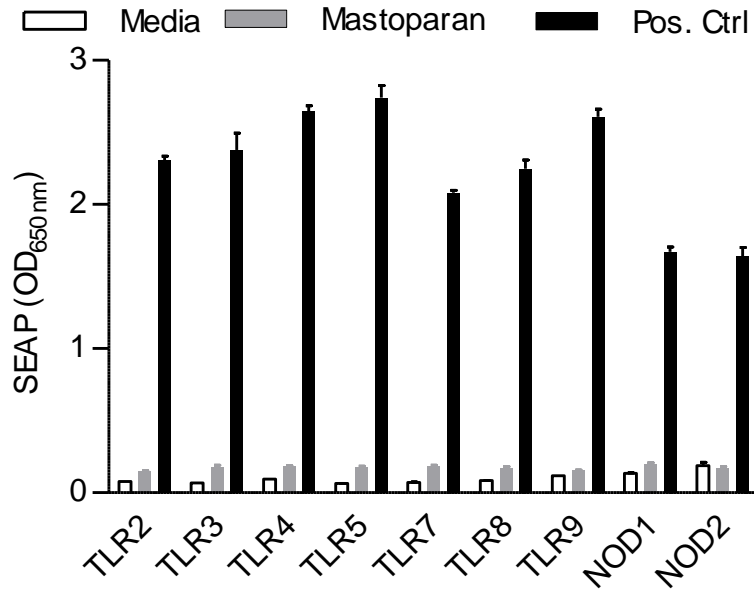

**Fig. S4. Receptor-specificity of mastoparan.** Quantification of activation of TLRs or NLRs by mastoparan (50  $\mu\text{g/ml}$ ) or positive controls specific to each receptor. SEAP, secreted embryonic alkaline phosphatase.

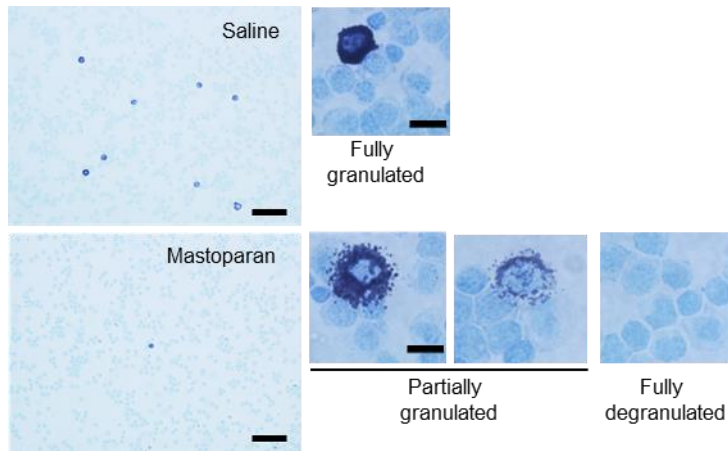

**Fig. S5. Detection of granulated MCs by toluidine blue staining.** Representative images of toluidine blue stained mouse peritoneal cells collected 30 min after intraperitoneal injection of mastoparan (2 mg/kg) or saline. Scale bar 50  $\mu\text{m}$ . Panels on the right depict higher magnification of MCs, scale bar 10  $\mu\text{m}$ . Note that in MCA-treated mice, MCs in various stages of degranulation can be detected.

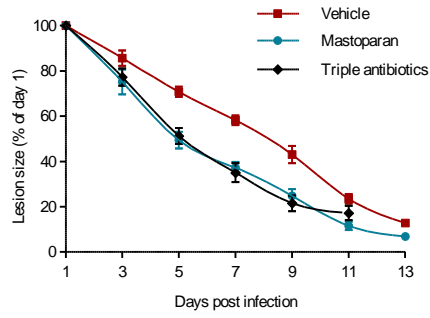

**Fig. S6. Comparison of mastoparan with triple antibiotic.** Lesion size of mice infected with *S. aureus* and treated with triple antibiotic (n = 18). Data of mastoparan and vehicle treatment from Fig. 3G were superimposed for comparison.



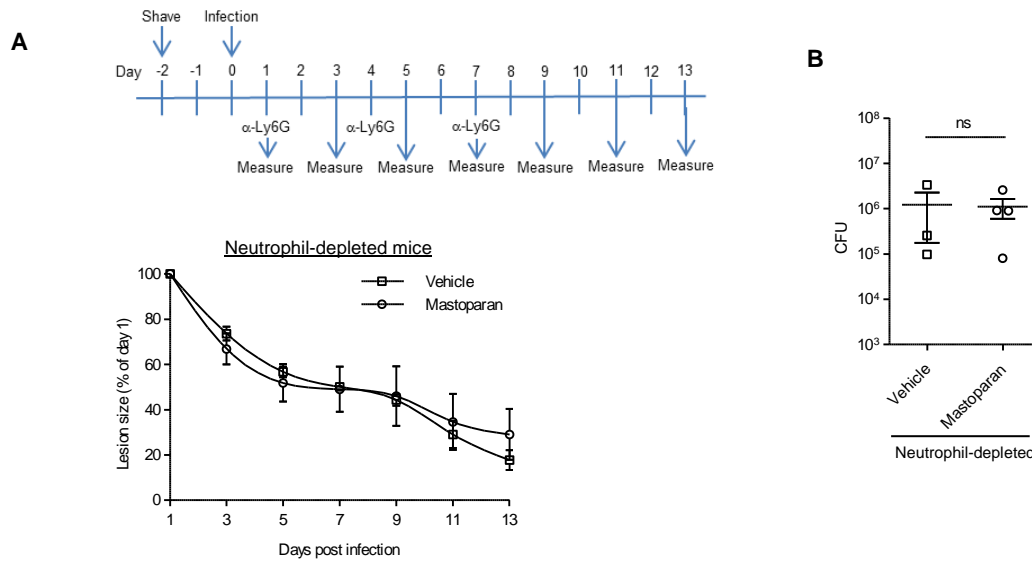

**Fig. S7. Mastoparan treatment in neutrophil-depleted mice.** (A) Schematic showing experimental plan and graph depicting mean lesion size at indicated time points post infection of neutrophil-depleted mice and treatment with vehicle or mastoparan (n = 5). (B) Bacterial numbers (CFUs) in the infected skin tissues day 15 post infection (n = 3-4).

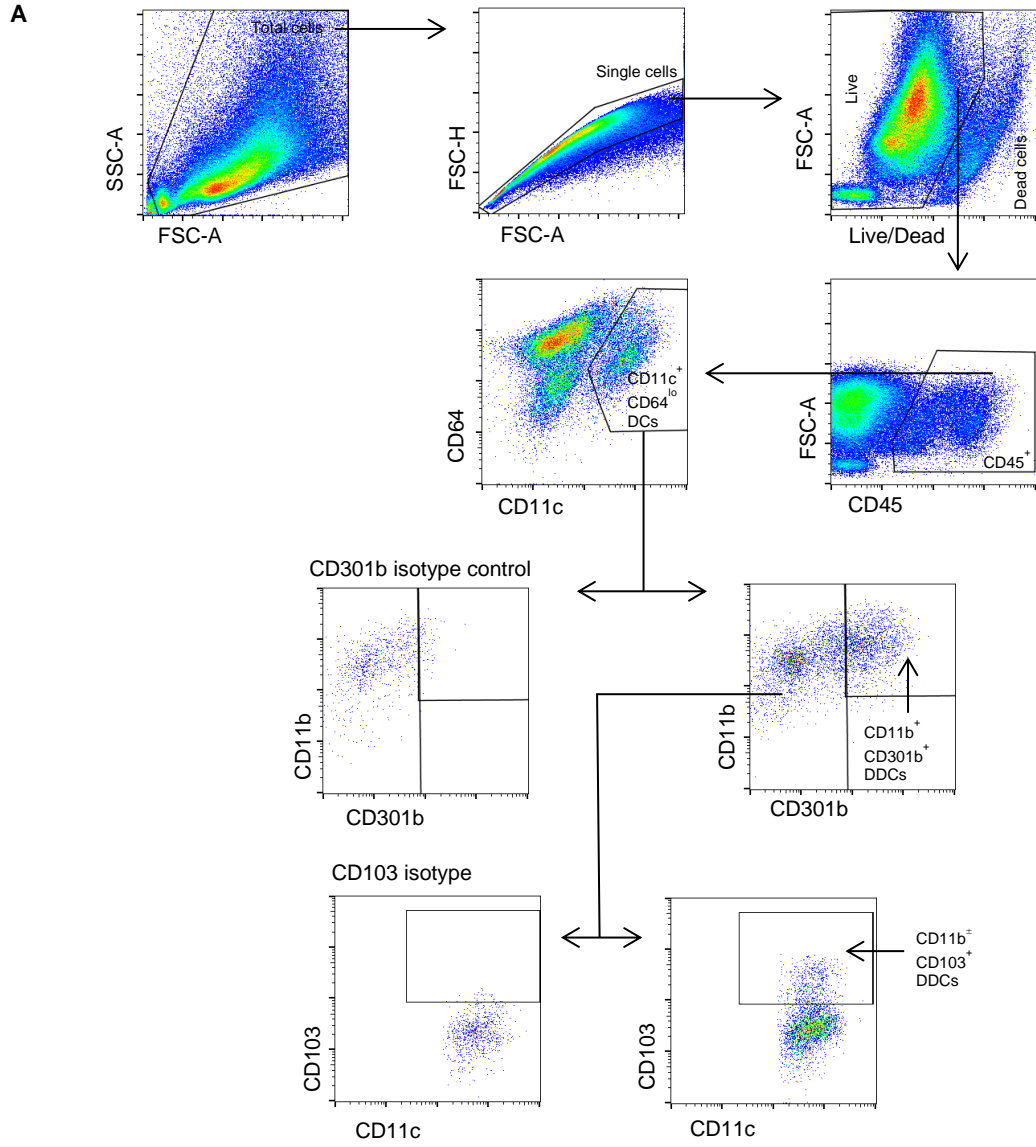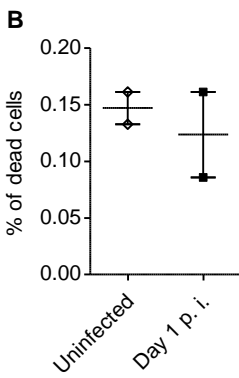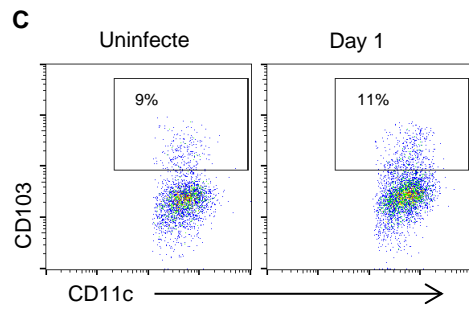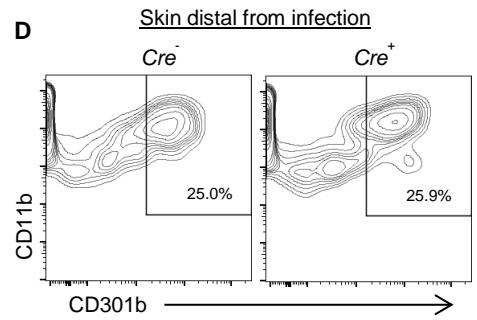

**Fig. S8. Flow cytometry plots from skin samples.** (A) Gating strategy for flow cytometry analysis of single cell suspensions from mouse skin. (B) Dead CD301b<sup>+</sup> DDCs in uninfected or infected skin samples (Live/Dead<sup>+</sup>CD45<sup>+</sup>CD64<sup>lo</sup>CD11c<sup>+</sup>CD11b<sup>+</sup>CD301b<sup>+</sup>), shown as percent of total dead cells (n = 2). (C) Representative flow cytometry plots depicting CD103<sup>+</sup> DDCs in the skin with or without infection (gated from CD45<sup>+</sup>CD64<sup>lo</sup>CD11c<sup>+</sup>CD301b<sup>-</sup> cells). (D) Representative flow cytometry plots depicting CD301b<sup>+</sup> DDC population (gated from CD45<sup>+</sup>CD64<sup>lo</sup>CD11c<sup>+</sup>CD11b<sup>+</sup> cells) in skin far from infected area of various mouse groups.

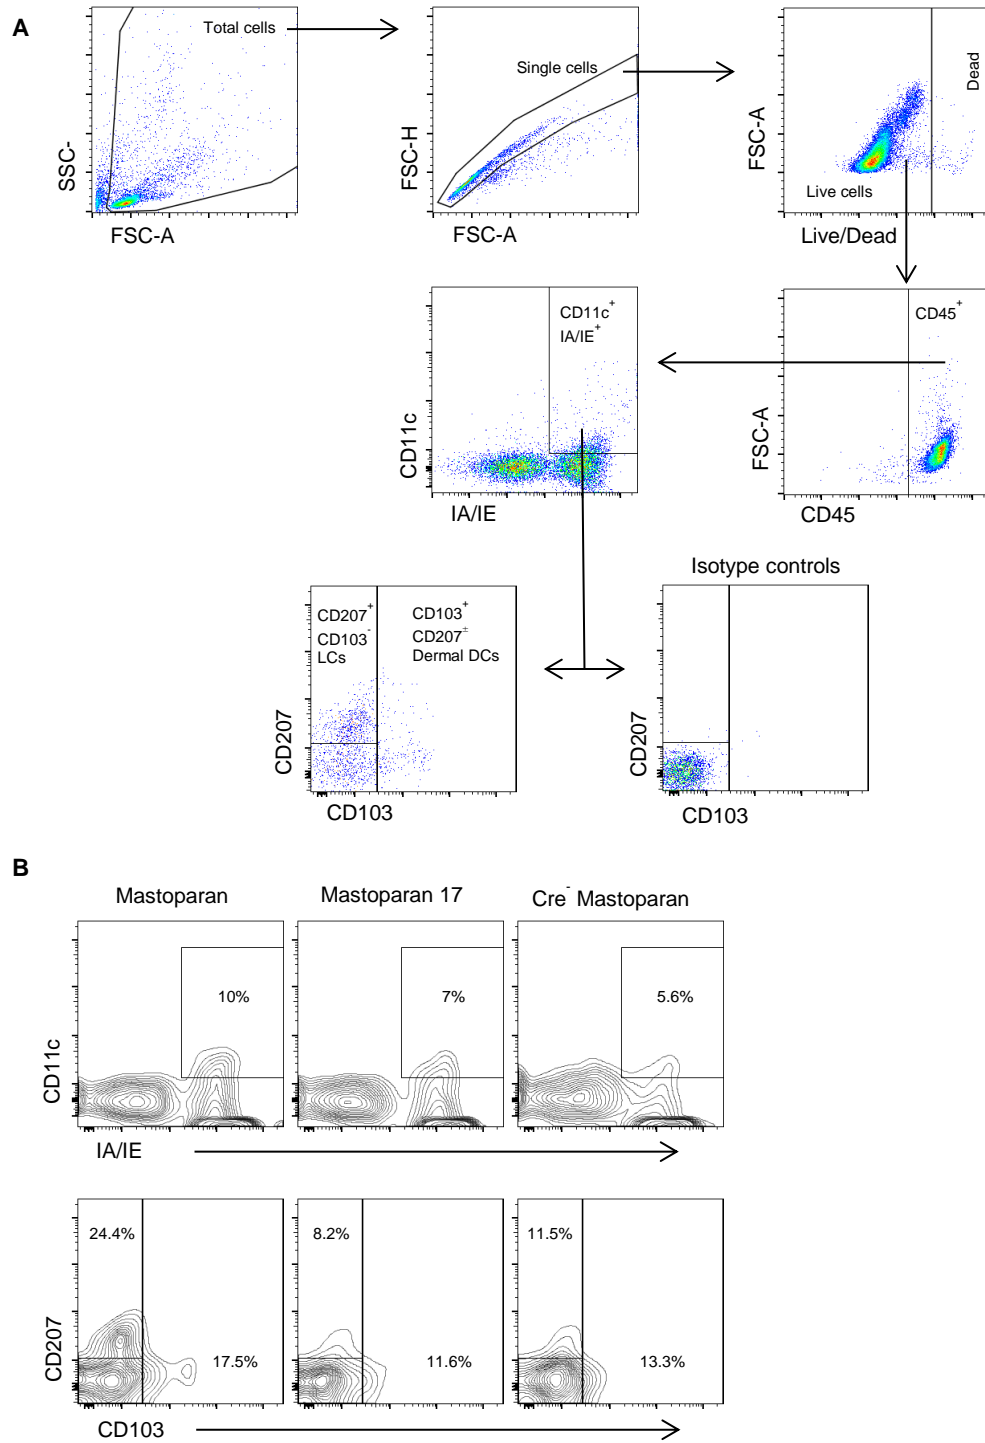

**Fig. S9. Flow cytometry plots from lymph node samples. (A)** Flow cytometry gating strategy to detect DCs in PNs. **(B)** Representative flow cytometry plots depicting IA/IE<sup>+</sup>CD11c<sup>+</sup> DCs, CD207<sup>+</sup> LCs and CD103<sup>+</sup> DDCs in PNs of various mouse groups.
